# Supplementary material for: Adjusted Indirect and Mixed Comparisons of Interventions for the Patient-Reported Outcomes Measures (PROMs) of Disabled Adults: A Systematic Review and Network Meta-Analysis
Source: Int J Environ Res Public Health. 2021 Mar 1;18(5):2406. doi: 10.3390/ijerph18052406 (PMC7967731; doi:10.3390/ijerph18052406)
Supplement: Supplementary file 1 [file ijerph-18-02406-s001.xlsx]

## Sheet: Sheet1
Perspective	Study	Scale of PROMs	Total Score	Follow-up (Weeks)	Operate Group			Control Group
					Mean	SD	N1	Mean	SD	N2
Physical Health	Ades 2003	(CS-PFP)Continous-Scale Physical Performance Test	100	0	43.6	13.2	19	47.9	19.1	14
				24	55.7	13.5	19	49	18.2	14
		MOS SF-37 Physical Functioning	100	0	59	20	19	69	15	14
				24	65	21	19	76	17	14
	Burton 2013	EuroQol-Visual Analogue Scale	100	0	0	1.17	60	0	1.17	60
				10	4.2	6.63	60	2.8	6.63	60
				20	-0.3	7	60	1.6	7	60
	Glombiewski 2010	Pain Intensity Qustionnaire	10	0	-5.6	1.5	62	-6	1.9	54
				32	-4.6	1.9	62	-5.1	2.1	54
				56	-4.7	2.1	62	-5.1	2.2	54
		Pain Diary	10	0	-4.7	1.8	62	-4.6	1.9	54
				32	-4.1	1.8	62	-4.2	1.9	54
				56	-4.1	2	62	-4.2	2	54
		Pain Disability Index (PDI)	7	0	-4.2	1.8	62	-5	2.1	54
				32	-3.4	2	62	-4.2	2.2	54
				56	-3.5	2	62	-4.4	2.1	54
	Sancassian 2017	Global Assessment of Functioning (GAF)	100	0	63.61	10.17	33	62.89	9.79	18
				12	65.24	9.93	33	68.28	10.09	18
	Seco 2015	WHOQOL-Physical	35	0	25.3	2.67	10	24	3.02	10
				8	24	3.13	10	23.1	4.7	10
	Lissshout 2018-Modal 1	Groningen Frailty Indicator (GFI)	15	0	-3.5	2.2	139	-3.5	2.5	142
				75	-3.9	0.718	139	-3.9	0.438	142
		QOL-Physical Composite Score (PCS) SF-12	50	0	45	10.55	139	46.3	10.53	142
				75	45.6	1.425	139	45	1.28	142
	Lissshout 2018-Modal 2	Groningen Frailty Indicator (GFI)	15	0	-3.5	2.2	139	-3.5	2.5	142
				75	-3.9	0.728	139	-3.9	0.448	142
		QOL-Physical Composite Score (PCS) SF-12	50	0	45	10.55	139	46.3	10.53	142
				75	45.3	1.045	139	45.3	1.288	142
	Lissshout 2018-Modal 3	Groningen Frailty Indicator (GFI)	15	0	-3.5	2.2	139	-3.5	2.5	142
				75	-3.9	0.693	139	-3.9	0.49	142
		QOL-Physical Composite Score (PCS) SF-12	50	0	45	10.55	139	46.3	10.53	142
				75	45.5	1.313	139	45.1	1.195	142
	Putton 2012	WHOQOL-Physical Wellbeing	100	0	62.6	18.9	17	59.4	17.3	17
				20	54.1	15.5	15	60.5	17	16
Psychological Health	Andreson 2009	MAP: The Measure of Actualization of Potential Test	5	0	3.53	0.57	27	3.53	0.49	20
				12	3.89	0.78	27	4.03	0.72	20
				24	3.71	0.77	27	3.94	0.69	20
	Burton 2013	Hospital Anxiety and Depression Scale-Depression (HADS-D)	21	0	0	0	60	0	0	60
				10	1.11	2.39	60	0.25	2.39	60
				20	0.23	2.6	60	0.04	2.6	60
		Hospital Anxiety and Depression Scale-Anxiety (HADS-A)	21	0	0	0	60	0	0	60
				10	0.11	2.71	60	0.23	2.71	60
				20	-0.33	2.67	60	0.45	2.67	60
	Chan 2012	The Geriatric Depression Scale-Short Form (GDS-15)	15	0	-4.875	4.67	8	-3.5	1.52	6
				6	-3.75	4.64	8	-3.12	2.04	6
		State Trait Anxiety Inventory-State (STAI-S/Y1)	80	0	-36.875	11.62	8	-37	5.76	6
				6	-32.25	12.26	8	-35.67	5.24	6
		State Trait Anxiety Inventory-Trait (STAI-T/Y2)	80	0	-38.375	12.72	8	-40.17	7.63	6
				6	-36.25	11.34	8	-39.33	7.71	6
	Glombiewski 2010	Health-Related Life Satisfaction Scale	35	0	25.3	8.3	62	22.4	7.9	54
				32	28.5	8.2	62	26.1	9	54
				56	28.5	9	62	26.7	10	54
		Beck Depression Inventory	63	0	-15	8.2	62	-17.1	9.1	54
				32	-12.1	8.8	62	-14.5	9.5	54
				56	-12.9	8.9	62	-15	9.1	54
	Seco 2015	State Trait Anxiety Inventory-Trait (STAI-T/Y2)	80	0	-23.1	5.78	10	-24.5	10.15	10
				8	-18	8.25	10	-23.3	13.47	10
		WHoQOL-Psychological Health	30	0	19.3	5.68	10	20.6	4.25	10
				8	19.9	5.95	10	20	3.5	10
	Lissshout 2018-Modal 1	QOL- Mental Composite Score (MCS) SF-12	50	0	48.3	9.6	139	48	10	142
				75	48.2	1.265	139	47.1	1.048	142
	Lissshout 2018-Modal 2	QOL- Mental Composite Score (MCS) SF-12	50	0	48.3	9.6	139	48	10	142
				75	48.2	1.235	139	47.3	1.025	142
	Lissshout 2018-Modal 3	QOL- Mental Composite Score (MCS) SF-12	50	0	48.3	9.6	139	48	10	142
				75	48	1.27	139	47.4	0.983	142
	Putton 2012	Alertness Observation List (AOL)	100	0	61.6	28.4	14	64.5	26.4	15
				5	69.8	27.6	10	62.8	21	10
				10	61.9	32.9	16	62.1	20.7	11
				15	63.5	32.4	14	59.6	13.4	13
				20	66	33.1	12	71.1	26.4	14
		WHOQOL-Material Wellbeing	100	0	74.4	12.6	17	75.5	10.3	15
				20	74.7	13.4	17	75.9	13.3	16
		WHOQOL-Activities	100	0	68.3	20.4	17	76.5	17.3	15
				20	77.7	13.5	17	83.5	17.5	16
	Allen 1996 in-group	Rosenberg Self-esteem Scale	50	0	14.3	1	24	14.1	1.2	24
				24	25.3	1.2	24	14	1.2	24
				48	35.3	0.5	24	14.3	1	24
		Spheres of Control Scale	180	0	61	1.9	24	61.5	2.3	24
				24	135.2	3.8	24	60.9	1.9	24
				48	178.8	3.7	24	61	1.9	24
		Affect Balance Scale (ABS)	9	0	1.7	0.5	24	1.8	0.4	24
				24	6.3	0.5	24	1.8	0.4	24
				48	8.1	0.3	24	1.7	0.5	24
	Allen 1996 within-group	Rosenberg Self-esteem Scale	50	0	13	2.1	24	14.1	1.2	24
				24	25.8	1.6	24	14	1.2	24
				48	35.3	0.6	24	14.3	1	24
		Spheres of Control Scale	180	0	64.4	4.3	24	61.5	2.3	24
				24	135	5.2	24	60.9	2.9	24
				48	179.3	3.7	24	61	1.9	24
		Affect Balance Scale (ABS)	9	0	1.6	0.5	24	1.8	0.4	24
				24	6.2	0.5	24	1.8	0.4	24
				48	8	0.3	24	1.7	0.5	24
Social Functioning	Chu 2020	Carefiver Burden Inventory (CBI)	96	0	0	0	26	0	0	30
				32	3.67	0.78	26	3.68	0.78	30
		Barthel Index (BI)	100	0	40	18.89	26	41.94	18.42	30
				8	47.83	22.12	26	47.67	26.9	30
				20	74.65	15.86	26	70.5	21.19	30
				32	72.69	21.18	26	61	36.63	30
	Glombiewski 2010	Coping Strategies Scale (CSS)	112	0	72.9	20.9	62	68.9	20	54
				32	85.6	24.1	62	85.3	22.4	54
				56	87.4	24.1	62	81.9	21.1	54
	Seco 2015	WHOQOL-Social Relationship	15	0	9.4	1.96	10	9.3	1.83	10
				8	10.7	3.09	10	9.2	2.2	10
		WHOQOL-Environment	40	0	27.4	5.82	10	27.4	6.5	10
				8	29.9	8.06	10	27.2	7.02	10
	Putton 2012	WHOQOL-Communication Wellbeing	100	0	64.4	25.7	17	65.6	20.7	17
				20	68.5	31.9	15	70.1	23.5	16
		WHOQOL-Social Wellbeing	100	0	44.3	21.5	17	50.7	18.1	17
				20	54	25.5	15	51.8	21.9	16
		WHOQOL-Development	100	0	64.4	23.1	17	73.3	19.5	17
				20	73.2	21.9	15	77.9	22.1	16
	Allen 1996 in-group	Community Integration Questionnaire	28	0	2.3	0.4	24	2.2	0.5	24
				24	15.7	0.5	24	2.3	0.4	24
				48	25.3	0.5	24	2.3	0.4	24
	Allen 1996 within-groups	Community Integration Questionnaire	28	0	2.3	0.6	24	2.2	0.5	24
				24	15.3	1	24	2.3	0.4	24
				48	25.3	0.9	24	2.3	0.4	24
Overall life quality	Burton 2013	EuroQol-5 Dimensions (EQ-5D)	1.59	0	0	0	60	0	0	60
				10	0.05	0.73	60	0.01	0.73	60
				20	0.11	0.75	60	0.01	0.75	60
		Function Limitation Profile (FLP)	117	0	0	0	60	0	0	60
				10	16	18.76	60	17	18.76	60
				20	14	20.8	60	22	20.8	60
	Chu 2021	EuroQol-5 Dimensions (EQ-5D)	1.59	0	0	0	26	0	0	30
				32	1.55	0.39	26	1.56	0.54	30
	Seco 2015	WHOQOL-General Health	10	0	7.8	1.75	10	6.7	1.95	10
				8	7.6	2.01	10	6.4	1.78	10
	Putton 2012	Behavioural Appraisal Scale (BAS)	100	0	36.6	15.17	17	36.3	15.16	18
				20	37.3	15.14	17	37	15.79	18
	Sancassian 2017	Health of the National Outcome Scale (HoNOS)-Total	48	0	-8.09	5.84	33	-7.22	5.33	18
				12	-5.45	4.95	33	-6.78	6.74	18
		Health of the National Outcome Scale (HoNOS)-Behavioral	12	0	-1.27	1.701	33	-1.22	1.896	18
				12	-1	1.75	33	-1.06	1.349	18
		Health of the National Outcome Scale (HoNOS)-Cognitive and physical impairment	8	0	-0.91	1.1	33	-0.61	1.116	18
				12	-0.94	0.873	33	-1.06	1.349	18
		Health of the National Outcome Scale (HoNOS)-Psychopathological symptoms	12	0	-2.58	1.714	33	-2.17	1.855	18
				12	-1.42	1.458	33	-1.94	1.798	18
		Health of the National Outcome Scale (HoNOS)-Social	16	0	-3.33	3.189	33	-2.89	2.166	18
				12	-2.36	2.46	33	-2.67	3.597	18
		Sense of Coherence (SOC-13)	91	0	52.15	8.804	33	53.5	14.085	18
				12	54.36	8.317	33	53.22	13.122	18
		The short form health survey SF-12	47	0	34.48	5.292	33	33.72	7.984	18
				12	35.67	5.951	33	34.17	7.725	18
		General Self Efficacy Scale (GSES)	40	0	28.58	4.981	33	28.17	4.26	18
				12	29.67	4.748	33	26.61	4.865	18
		Clinical Global Impression-Severity Scale (CGI-S)	7	0	-3.18	0.88	33	-3.17	0.86	18
				12	-2.97	0.81	33	-2.83	0.99	18
		Global Assessment of Functioning (GAF)	100	0	63.61	10.17	33	62.89	9.79	18
				12	65.24	9.93	33	68.28	10.09	18
		Biological Rhythms Interview of Assessment in Neuropsychiatry (BRAIN)	84	0	-40.12	6.12	33	-41	8.66	18
				12	-40.58	7.82	19	-40	7.8	18
	Got 2008	Quality of life enjoyment and satisfaction questionnaire (Q-LES-Q)-Subjective Feelings	5	0	3.07	0.6	19	3.46	0.47	18
				12	3.23	0.64	19	3.29	0.51	18
		Quality of life enjoyment and satisfaction questionnaire (Q-LES-Q)-Leisure time activities	5	0	3.56	0.51	19	3.9	0.36	18
				12	3.37	0.73	19	3.56	0.7	18
		Quality of life enjoyment and satisfaction questionnaire (Q-LES-Q)-Social relationship	5	0	2.87	0.52	19	3.17	0.58	18
				12	3.11	0.58	19	3.11	0.65	18
		Quality of life enjoyment and satisfaction questionnaire (Q-LES-Q)-General activities	5	0	3.74	0.48	19	3.97	0.45	18
				12	3.86	0.55	19	3.86	0.57	18
		Scale of Independent behavior-Revised (Social Interaction)	3	0	1.14	0.4	19	1.28	0.65	18
				12	1.38	0.67	19	1.26	0.64	18
		Scale of Independent behavior-Revised (Language expression)	3	0	0.98	0.59	19	1.15	0.64	18
				12	1.17	0.74	19	1.21	0.66	18
		Scale of Independent behavior-Revised (Language comprehensive)	3	0	0.97	0.47	19	1.16	0.65	18
				12	1.16	0.69	19	1.07	0.65	18
	Mengoni 2016	Epilepsy and learining disabilities quality of life scale-seizure severity	70	0	-29.25	9.37	11	-27.5	8.29	12
				4	-26.66	2.12245	8	-26.42	2.02296	10
				12	-29.17	2.12245	9	-24.26	2.03571	11
				20	-27.06	2.23469	8	-25.62	2.0102	13
		Epilepsy and learining disabilities quality of life scale-side effect	95	0	-65.99	13.75	15	-71.56	4.93	11
				4	-65.98	2.62245	17	-65.66	5.68112	12
				12	-65.15	2.70918	15	-66.57	3.30357	13
				20	-64.87	2.68878	14	-64.54	3.51531	11
		Epilepsy and learining disabilities quality of life scale-behavior	45	0	-15.96	5.33	21	-14.36	3.25	19
				4	-14.67	0.706633	19	-15.48	0.793367	15
				12	-15.25	0.747449	16	-14.39	0.795918	15
				20	-14.5	0.747449	16	-15.86	0.780612	16
		Epilepsy and learining disabilities quality of life scale-Mood	80	0	-30.72	7.31	20	-28.27	6.1	19
				4	-29.53	1.1148	18	-31.07	1.19643	15
				12	-31.62	1.17602	16	-30.64	1.20663	15
				20	-30.05	1.1199	17	-31.08	1.17347	16
		Euro Quality of Life-5 Dimensions	1.59	0	0.611	0.0670918	21	0.461	0.0816327	19
				4	0.643	0.0594388	18	0.494	0.103316	15
				12	0.594	0.0806122	16	0.497	0.119388	14
				20	0.661	0.080102	17	0.622	0.111224	13
		Euro Quality of Life-Visual Analoge Scale	100	0	70.62	27.3	21	77.37	16.45	19
				4	76.89	23.84	18	71.33	21.25	15
				12	74.88	20.17	16	83.67	17.78	15
				20	76.69	25.52	16	78.2	21.53	15
	Ottomanelli 2013	Functional independence measure-total	126	0	98.6	23.8	81	98.2	23.7	76
				48	104.7	17.9	71	100.4	21.5	69
		Functional independence measure-cognitive	35	0	33.8	2.3	81	33.7	2.8	76
				48	33.9	2.2	71	34.1	1.5	69
		Functional independence measure-mobility	91	0	66.9	21.6	81	66.4	22.2	76
				48	70.7	17.4	71	67.4	20.8	69
		Vertans RAND 36-item healthy survey-physical component score	100	0	27.7	7.5	81	28.1	8.4	76
				24	27.9	7.9	71	27.8	8	72
				48	29.3	7.7	71	27.6	7.9	69
		Vertans RAND 36-item healthy survey-mental component score	100	0	54.7	13.8	81	55.6	12.9	76
				24	56.3	11.6	71	55.3	13	72
				48	55.1	14.3	71	55	14.2	69
		Craig handicap assessment and reporting techique-social integration	100	0	82	13.6	81	84.7	12.7	76
				24	79.9	15.9	71	83.5	13.7	72
				48	80.9	16.4	71	84.8	14	69
		Craig handicap assessment and reporting techique-Cognitive indipendence	100	0	89.1	16.6	81	90.8	14.9	76
				24	92	19.2	71	90.3	17.2	72
				48	90.3	17.4	71	92.5	14.5	69
		Craig handicap assessment and reporting techique-Physical indipendence	100	0	85.7	20.9	81	87.2	22.1	76
				24	88.9	18.7	71	88.1	21	72
				48	87.4	20.3	71	86.7	23.8	69
		Craig handicap assessment and reporting techique-Occupation	100	0	51.5	32.9	81	50.4	30.6	76
				24	55.4	35.5	71	51.9	32.9	72
				48	53.9	33.9	71	52.3	33	69
		Craig handicap assessment and reporting techique-Mobility	100	0	80.4	17	81	80.4	22.4	76
				24	83.4	17.6	71	83	21.9	72
				48	81.6	19.9	71	83.9	20.9	69
		Craig handicap assessment and reporting techique-Economic self-sufficiency	100	0	51.5	37.8	81	52.6	36.9	76
				24	55.3	36.1	71	53.5	33.7	72
				48	56.8	36.1	71	59.1	3.8	69
	Szanton 2011	Activity of daily life difficulties	5	0	-2.1	1.2	24	-2.6	1.4	16
				24	-0.7	0.8	24	-2.1	2.3	16
		Instrumental activity of daily life difficulties	6	0	-2.3	1.4	24	-2	1.1	16
				24	-1.2	1.8	24	-1.8	1.9	16
		Euro Quality of life	100	0	57.9	18.7	24	63.1	19.1	16
				24	75.8	15.04	24	62.5	24.9	16
		Euro Quality of Life-5 Dimensions	6	0	3.8	1.2	24	2.9	1.6	16
				24	3.8	1.7	24	3.8	2.2	16
		Fall efficacy	65	0	33.8	15.5	24	30.7	17.1	16
				24	28.8	14.1	24	36.1	27.6	16
